# Supplementary material
Source: PubMed Central journal article supplement (PMC4415047)

## Supporting Information

# Time-Resolved Fluorescence Anisotropy of Bicyclo[1.1.1]pentane/Tolane-Based Molecular Rods Included in Tris(*o*-phenylenedioxy)cyclotriphosphazene (TPP)

Marco Cipolloni,<sup>†</sup> Jiří Kaleta,<sup>†</sup> Milan Mašát,<sup>†</sup> Paul I. Dron,<sup>‡</sup> Yongqiang Shen,<sup>§</sup> Ke Zhao,<sup>§</sup>  
Charles T. Rogers,<sup>§</sup> Richard K. Shoemaker,<sup>‡</sup> and Josef Michl<sup>†,‡,\*</sup>

<sup>†</sup>*Institute of Organic Chemistry and Biochemistry, Academy of Sciences of the Czech  
Republic, Flemingovo nám. 2, 16610 Prague, Czech Republic,*

<sup>‡</sup>*Department of Chemistry and Biochemistry and* <sup>§</sup>*Department of Physics, University of  
Colorado, Boulder, CO 80309, U.S.A.*

### Table of Contents

|                                                                    |          |
|--------------------------------------------------------------------|----------|
| <i>Solid-state NMR spectra</i> .....                               | S2 – S3  |
| Figure S1: 20% <b>2</b> @TPP- <i>d</i> <sub>12</sub> .....         | S2       |
| Figure S2: 20% <b>3</b> @TPP- <i>d</i> <sub>12</sub> .....         | S2       |
| Figure S3: UV-vis spectra.....                                     | S4       |
| <i>Solution <sup>1</sup>H and <sup>13</sup>C NMR spectra</i> ..... | S5 – S20 |
| Compound <b>1</b> .....                                            | S5       |
| Compound <b>2</b> .....                                            | S7       |
| Compound <b>3</b> .....                                            | S10      |
| Compound <b>4</b> .....                                            | S13      |
| Compound <b>8</b> .....                                            | S15      |
| Compound <b>13</b> .....                                           | S18      |

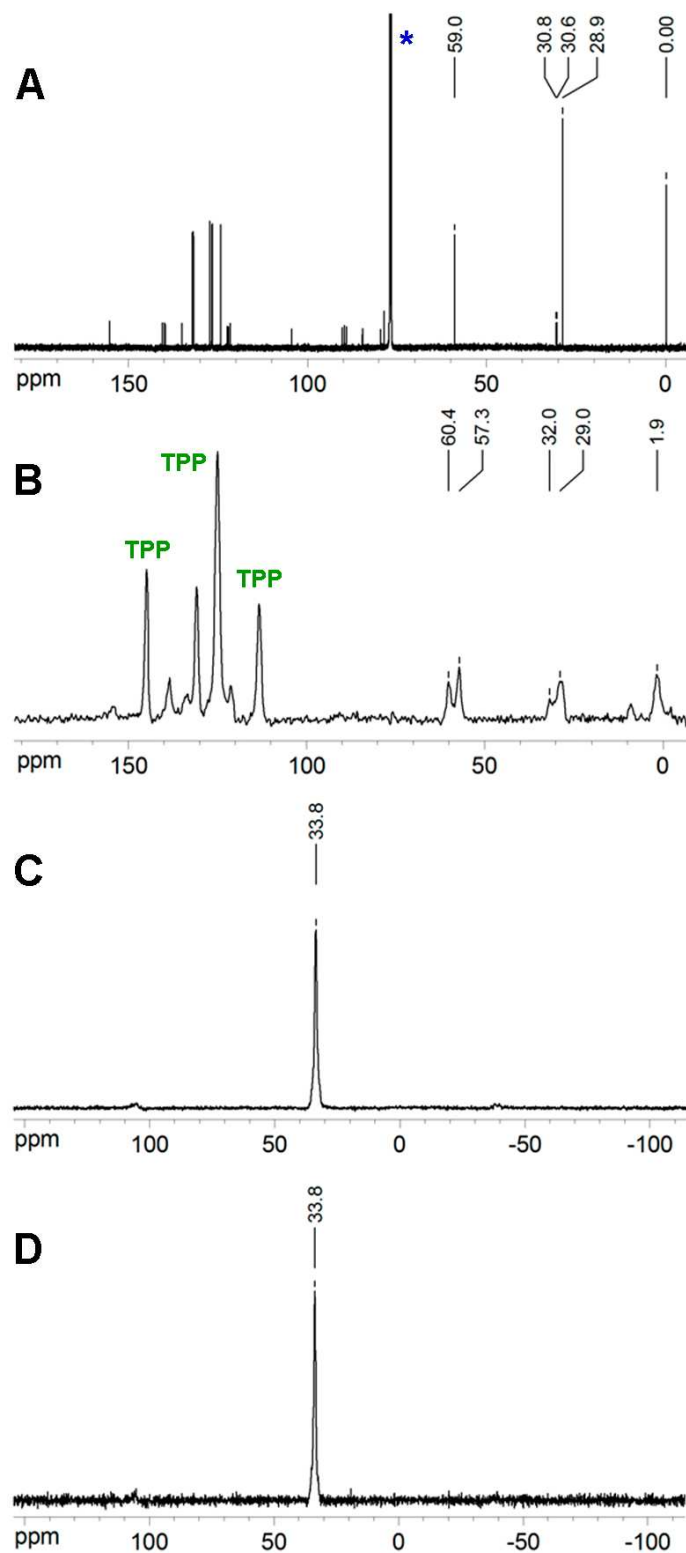

**Figure S1:** A: **2**  $^{13}\text{C}$  NMR in  $\text{CDCl}_3$  (\*) solution; B: 20% **2**@TPP- $d_{12}$  CP MAS  $^{13}\text{C}$  NMR; C: 20% **2**@TPP- $d_{12}$   $^{31}\text{P}$  CP MAS NMR; D: 20% **2**@TPP- $d_{12}$   $^{31}\text{P}$  SPE NMR.

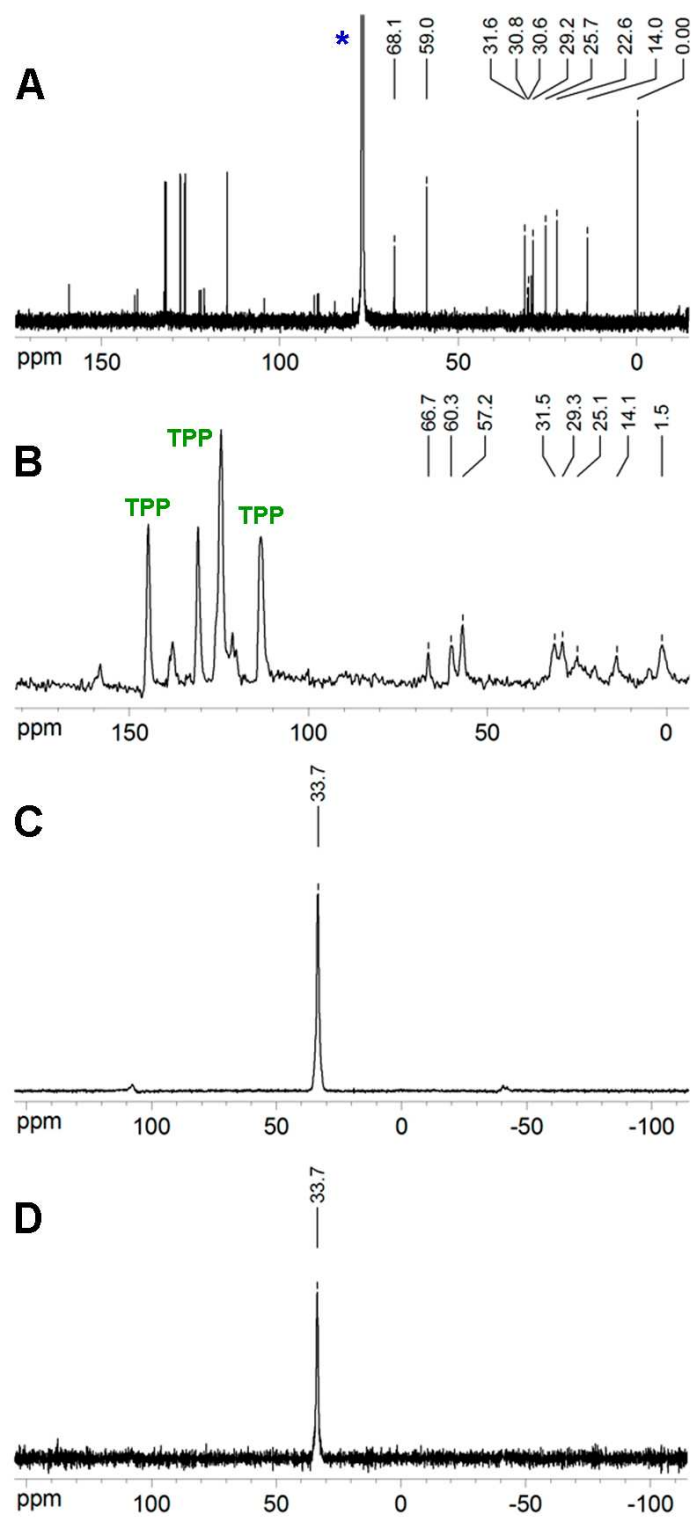

**Figure S2:** A: **3** <sup>13</sup>C NMR in CDCl<sub>3</sub> (\*) solution; B: 20%**3**@TPP-*d*<sub>12</sub> CP MAS <sup>13</sup>C NMR; C: 20%**3**@TPP-*d*<sub>12</sub> <sup>31</sup>P CP MAS NMR; D: 20%**3**@TPP-*d*<sub>12</sub> <sup>31</sup>P SPE NMR.

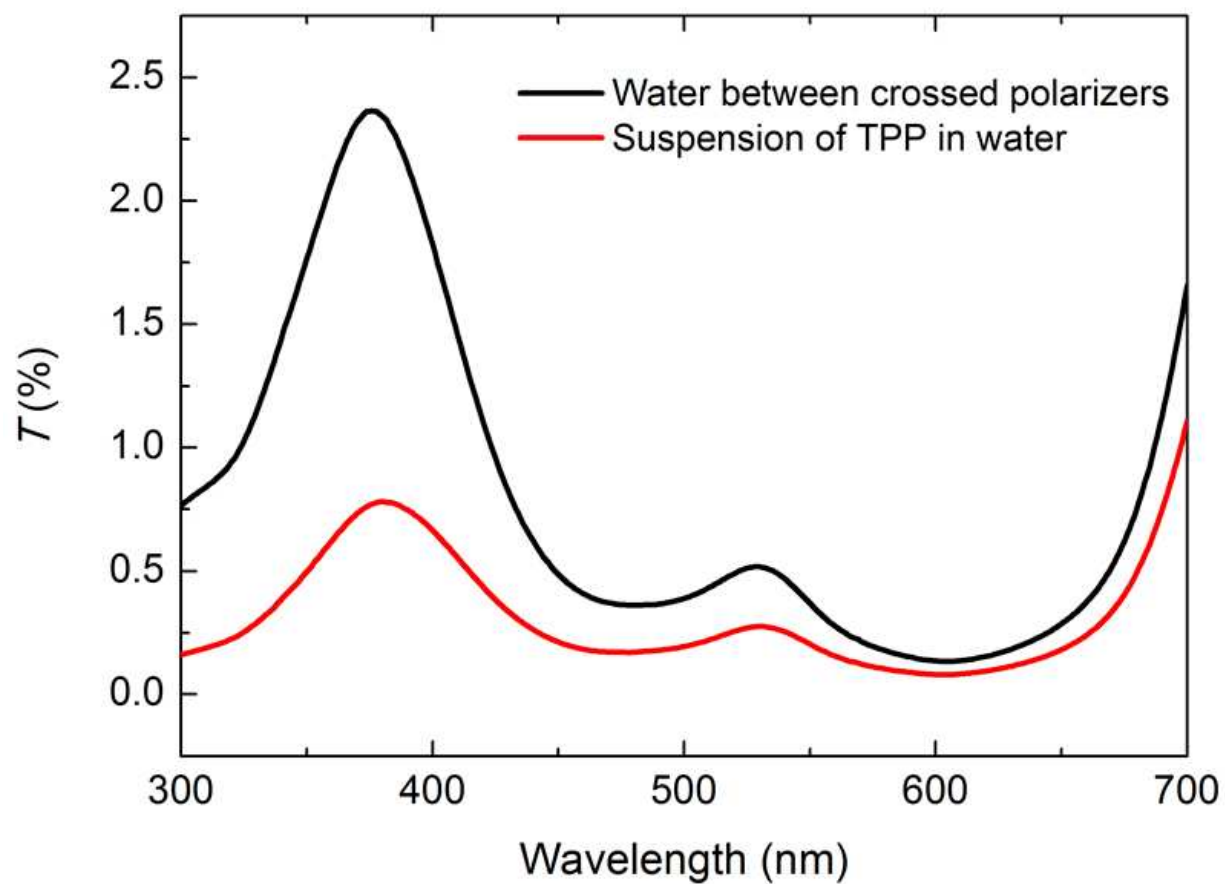

**Figure S3:** UV-vis transmittance – water (black) and colloidal aqueous suspension of TPP (red) between crossed polarizers.

$^1\text{H}$  NMR (600 MHz,  $\text{CDCl}_3$ ): ((3-((4'-(Biphenyl-4-ylethynyl)biphenyl-4-yl)ethynyl)bicyclo[1.1.1]pent-1-yl)ethynyl)trimethylsilane (**1**)

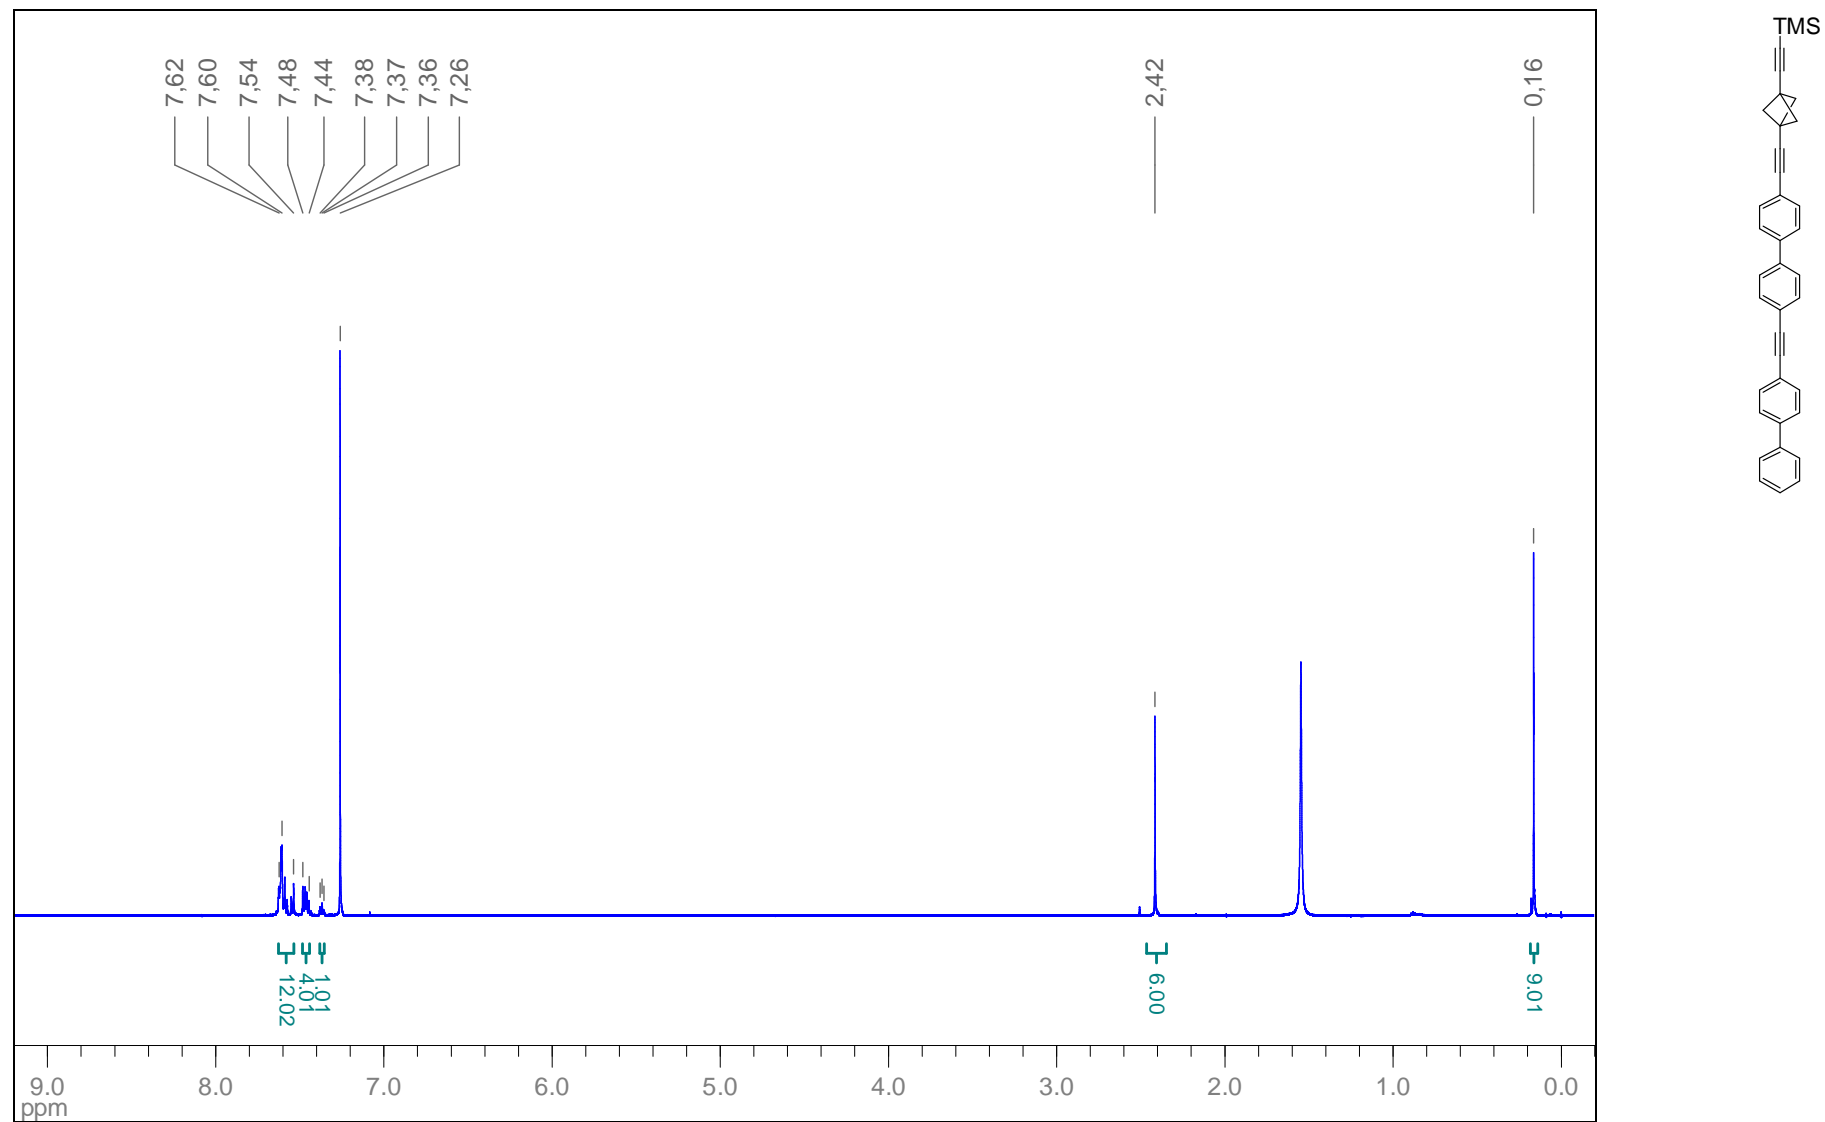

$^{13}\text{C}$  NMR (150 MHz,  $\text{CDCl}_3$ ): ((3-((4'-(Biphenyl-4-ylethynyl)biphenyl-4-yl)ethynyl)bicyclo[1.1.1]pent-1-yl)ethynyl)trimethylsilane (**1**)

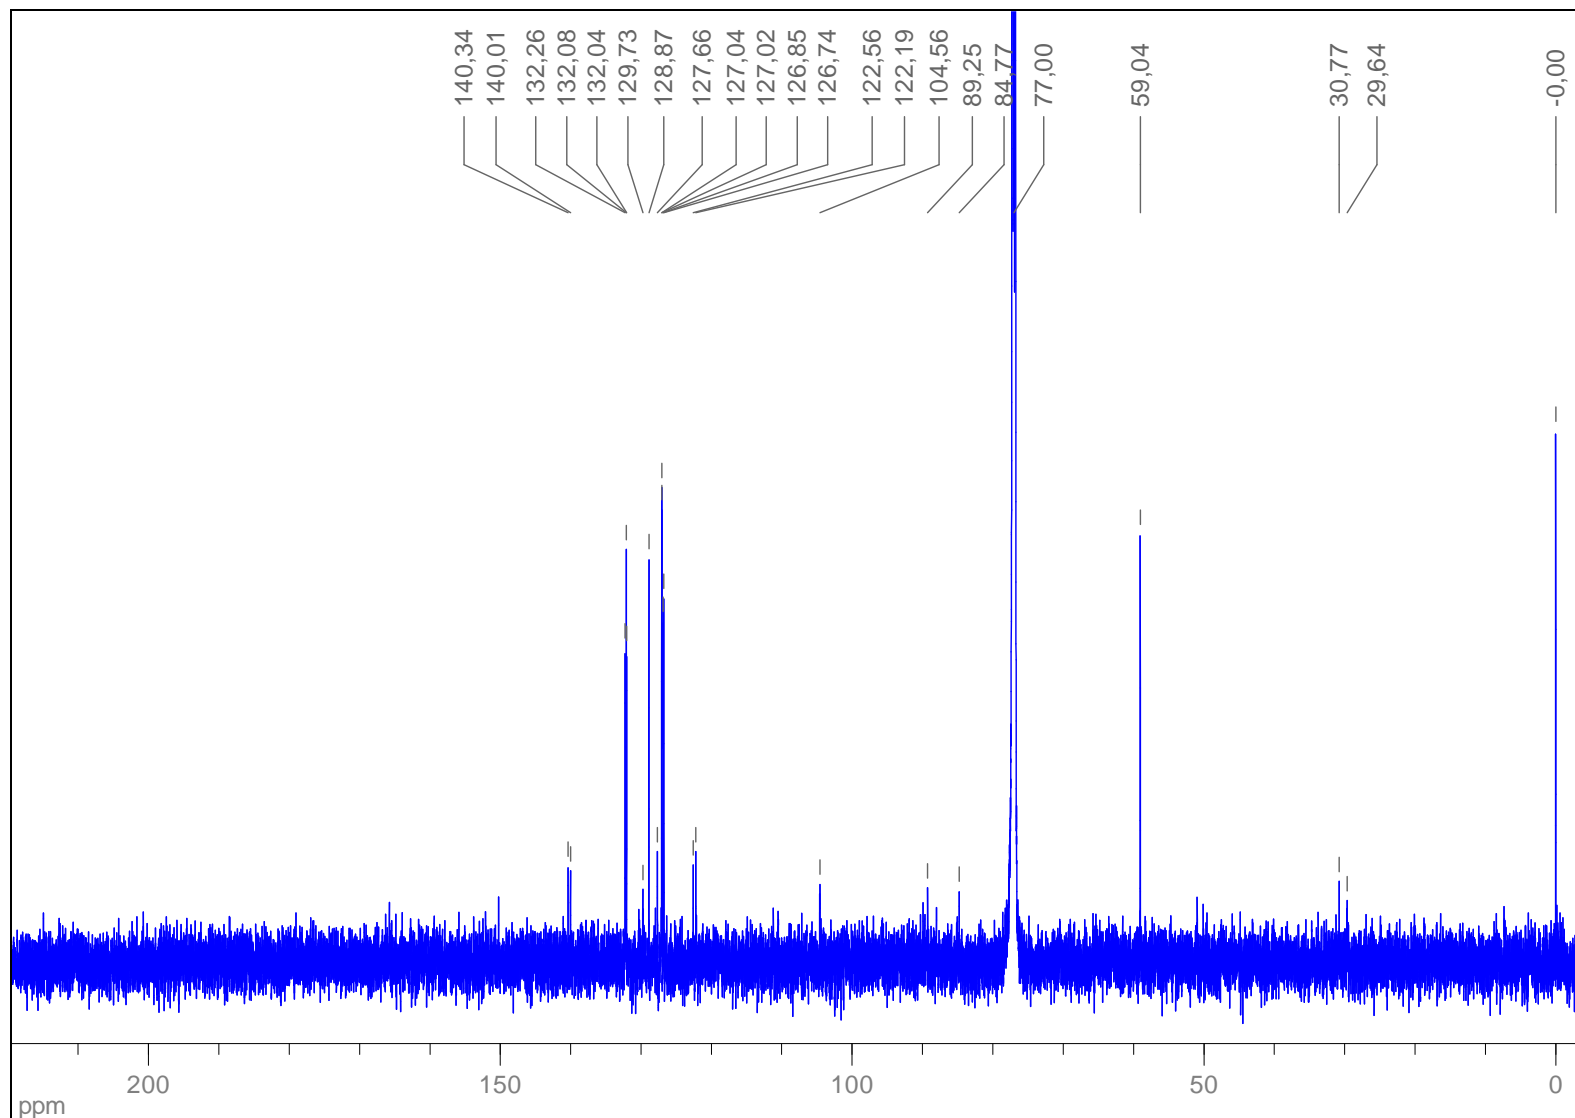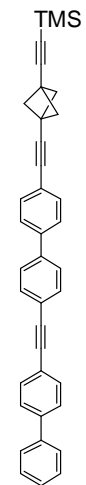

<sup>1</sup>H NMR (500 MHz, CDCl<sub>3</sub>): ((3-((4'-((4'-*tert*-Butoxybiphenyl-4-yl)ethynyl)biphenyl-4-yl)ethynyl)bicyclo[1.1.1]pent-1-yl)ethynyl)-trimethylsilane (**2**)

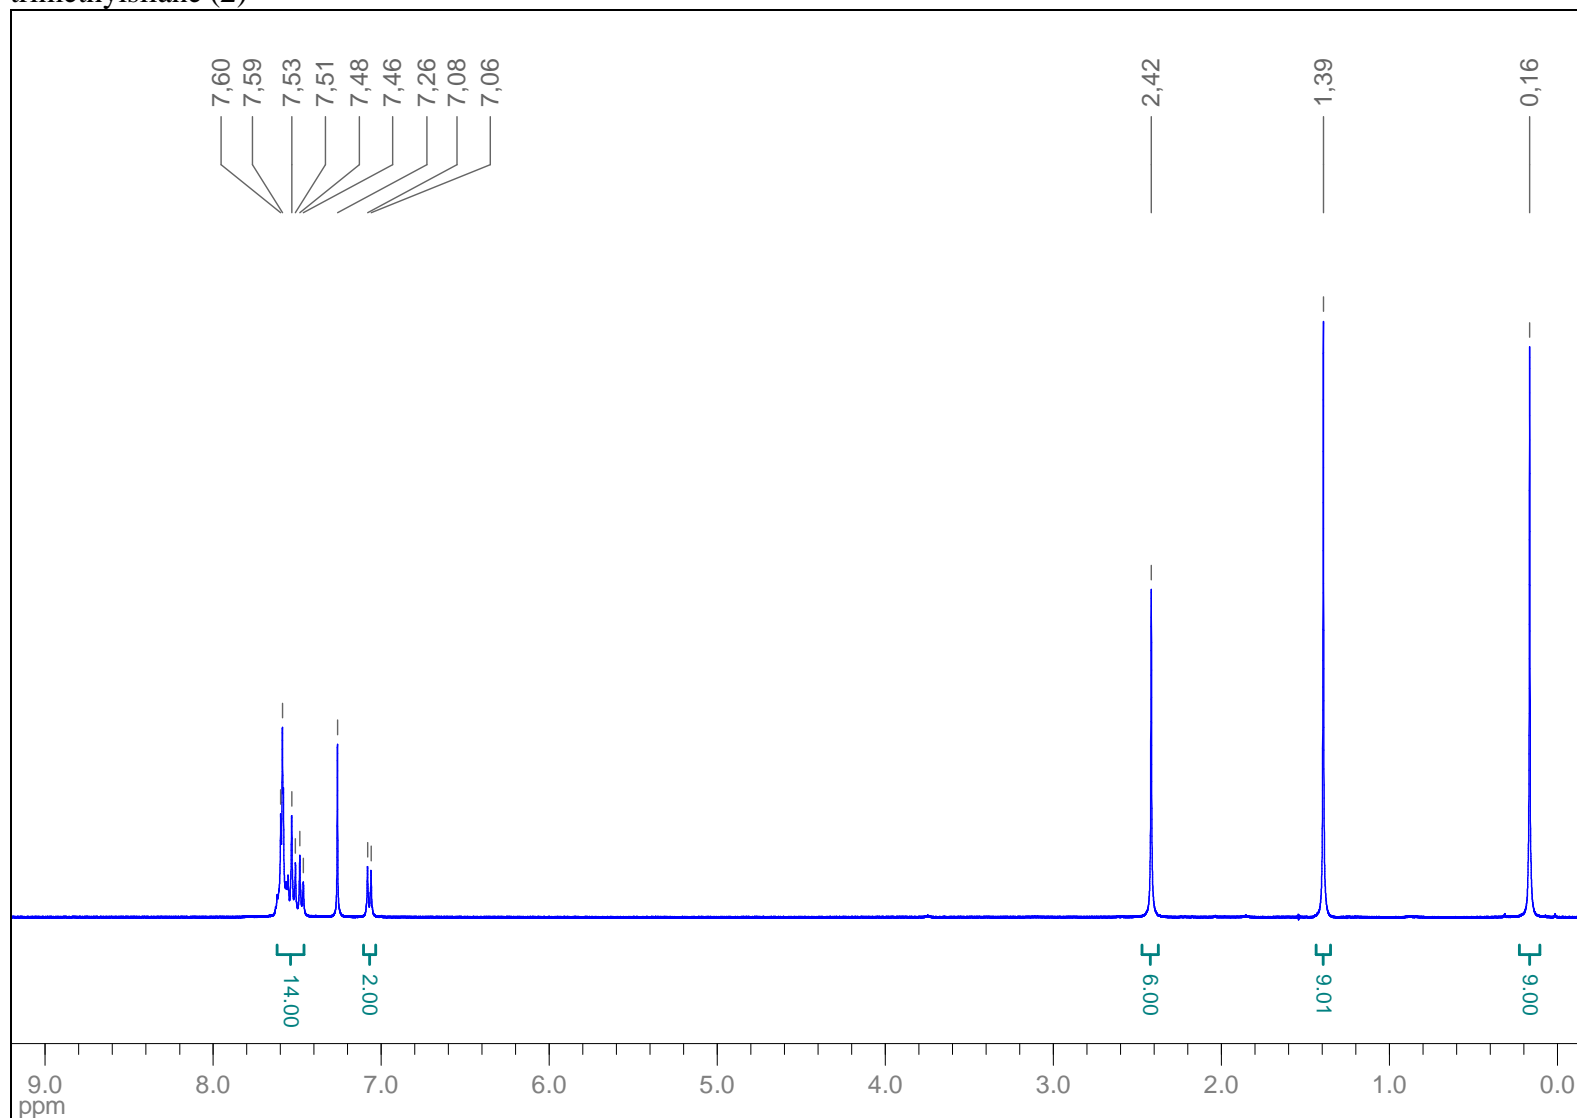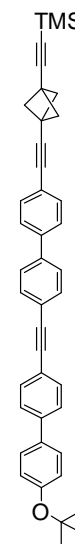

$^{13}\text{C}$  NMR (150 MHz,  $\text{CDCl}_3$ ): ((3-((4'-((4'-*tert*-Butoxybiphenyl-4-yl)ethynyl)biphenyl-4-yl)ethynyl)bicyclo[1.1.1]pent-1-yl)ethynyl)-trimethylsilane (**2**)

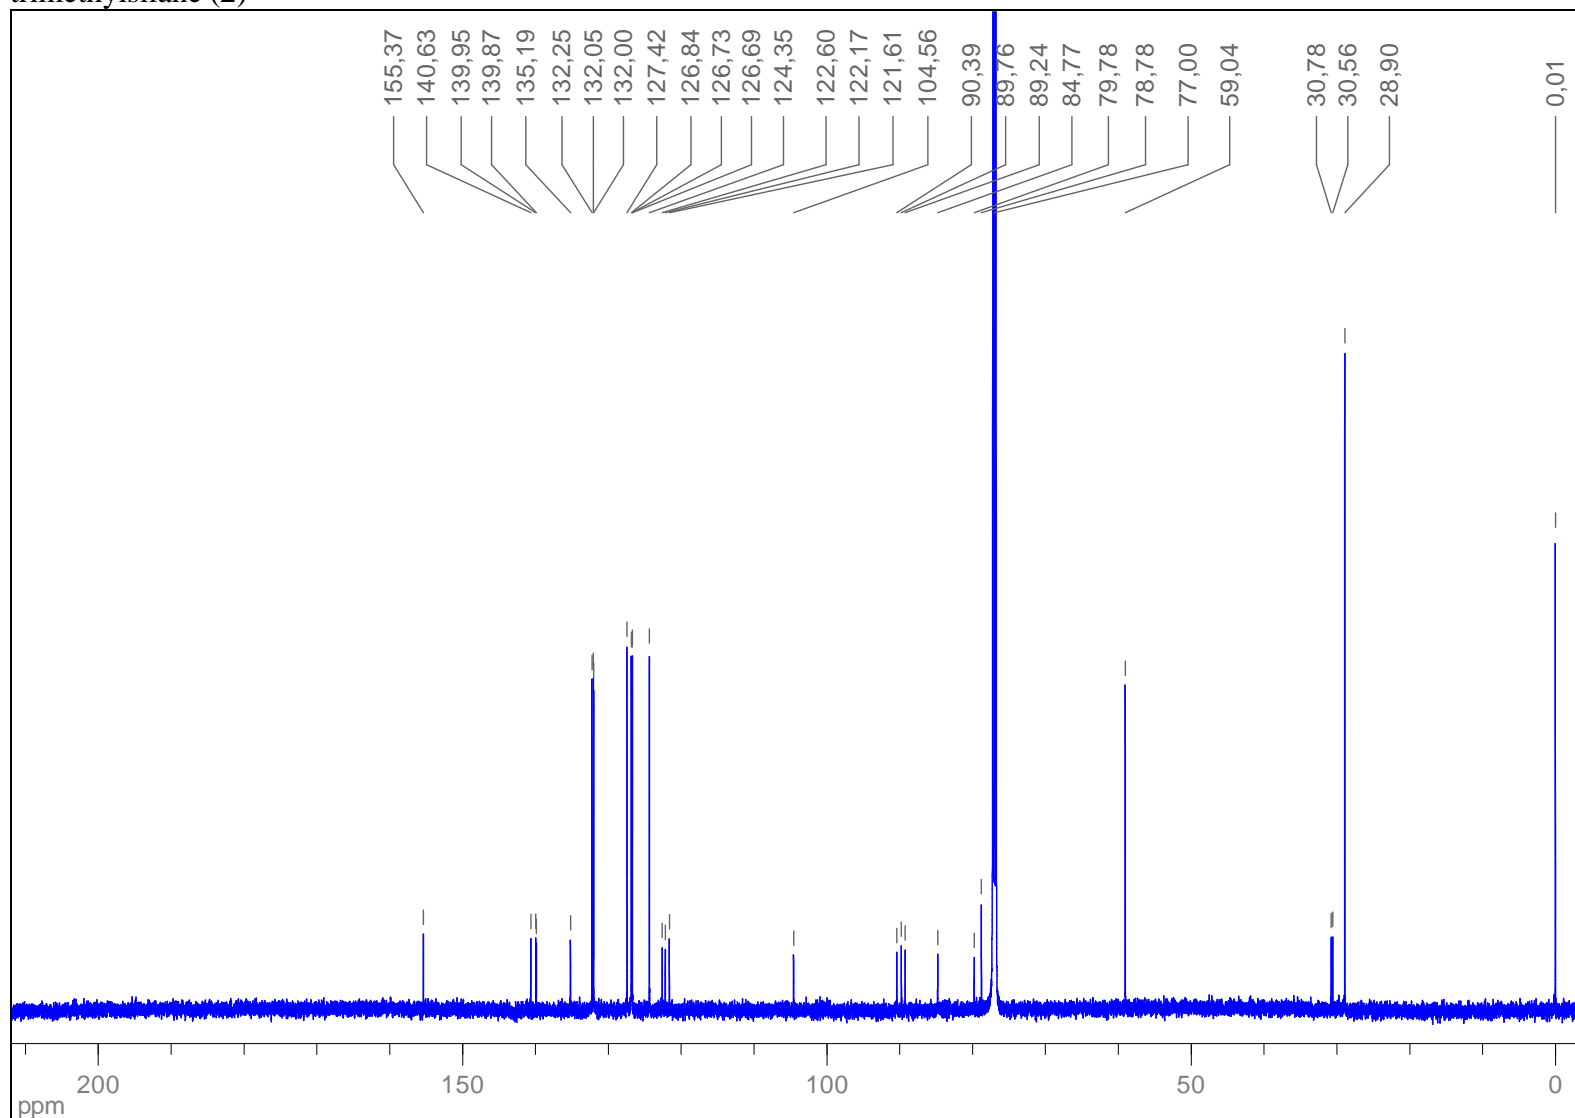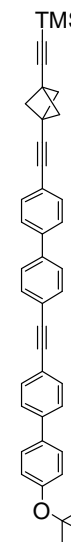



$^{13}\text{C}$  APT NMR (125 MHz,  $\text{CDCl}_3$ ): ((3-((4'-*tert*-Butoxybiphenyl-4-yl)ethynyl)biphenyl-4-yl)ethynyl)bicyclo[1.1.1]pent-1-yl)ethynyl)-trimethylsilane (**2**)

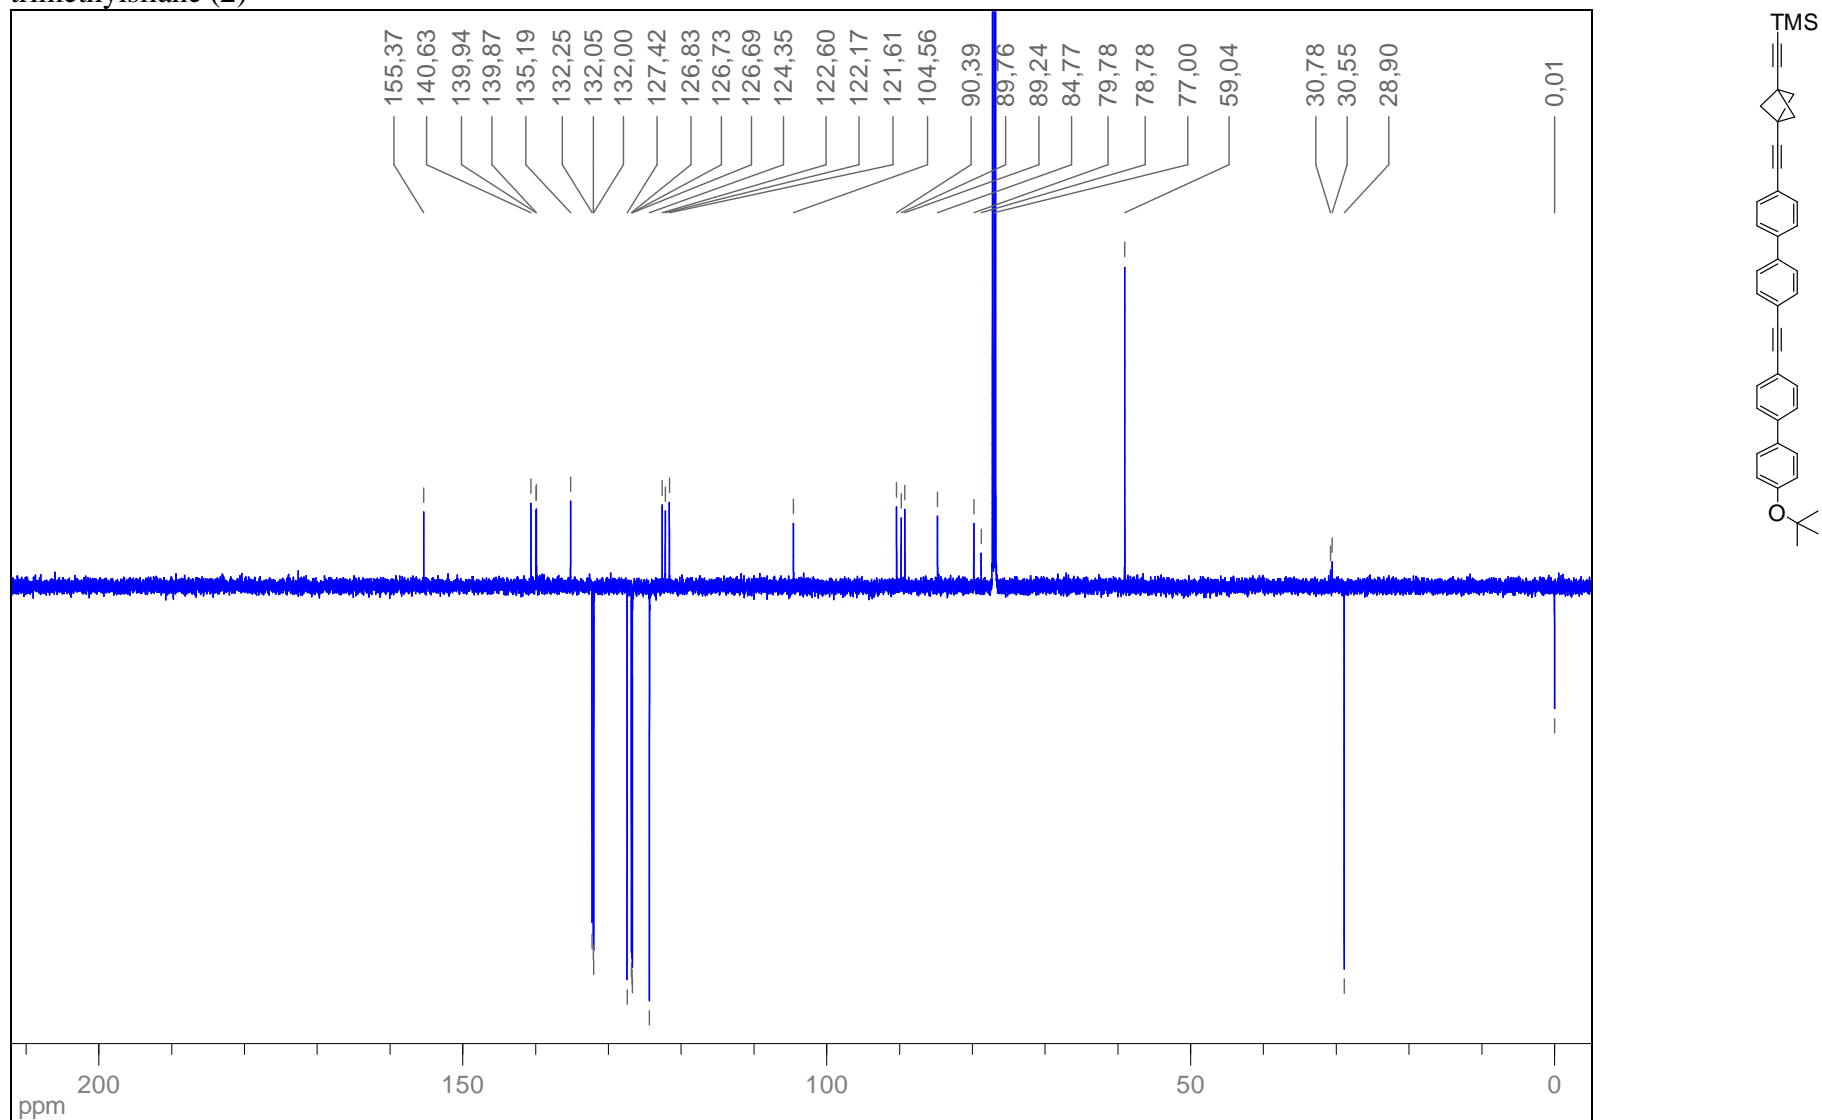

$^1\text{H}$  NMR (600 MHz,  $\text{CDCl}_3$ ): ((3-((4'-((4'-(Hexyloxy)biphenyl-4-yl)ethynyl)biphenyl-4-yl)ethynyl)bicyclo[1.1.1]pent-1-yl)ethynyl)-trimethylsilane (**3**)

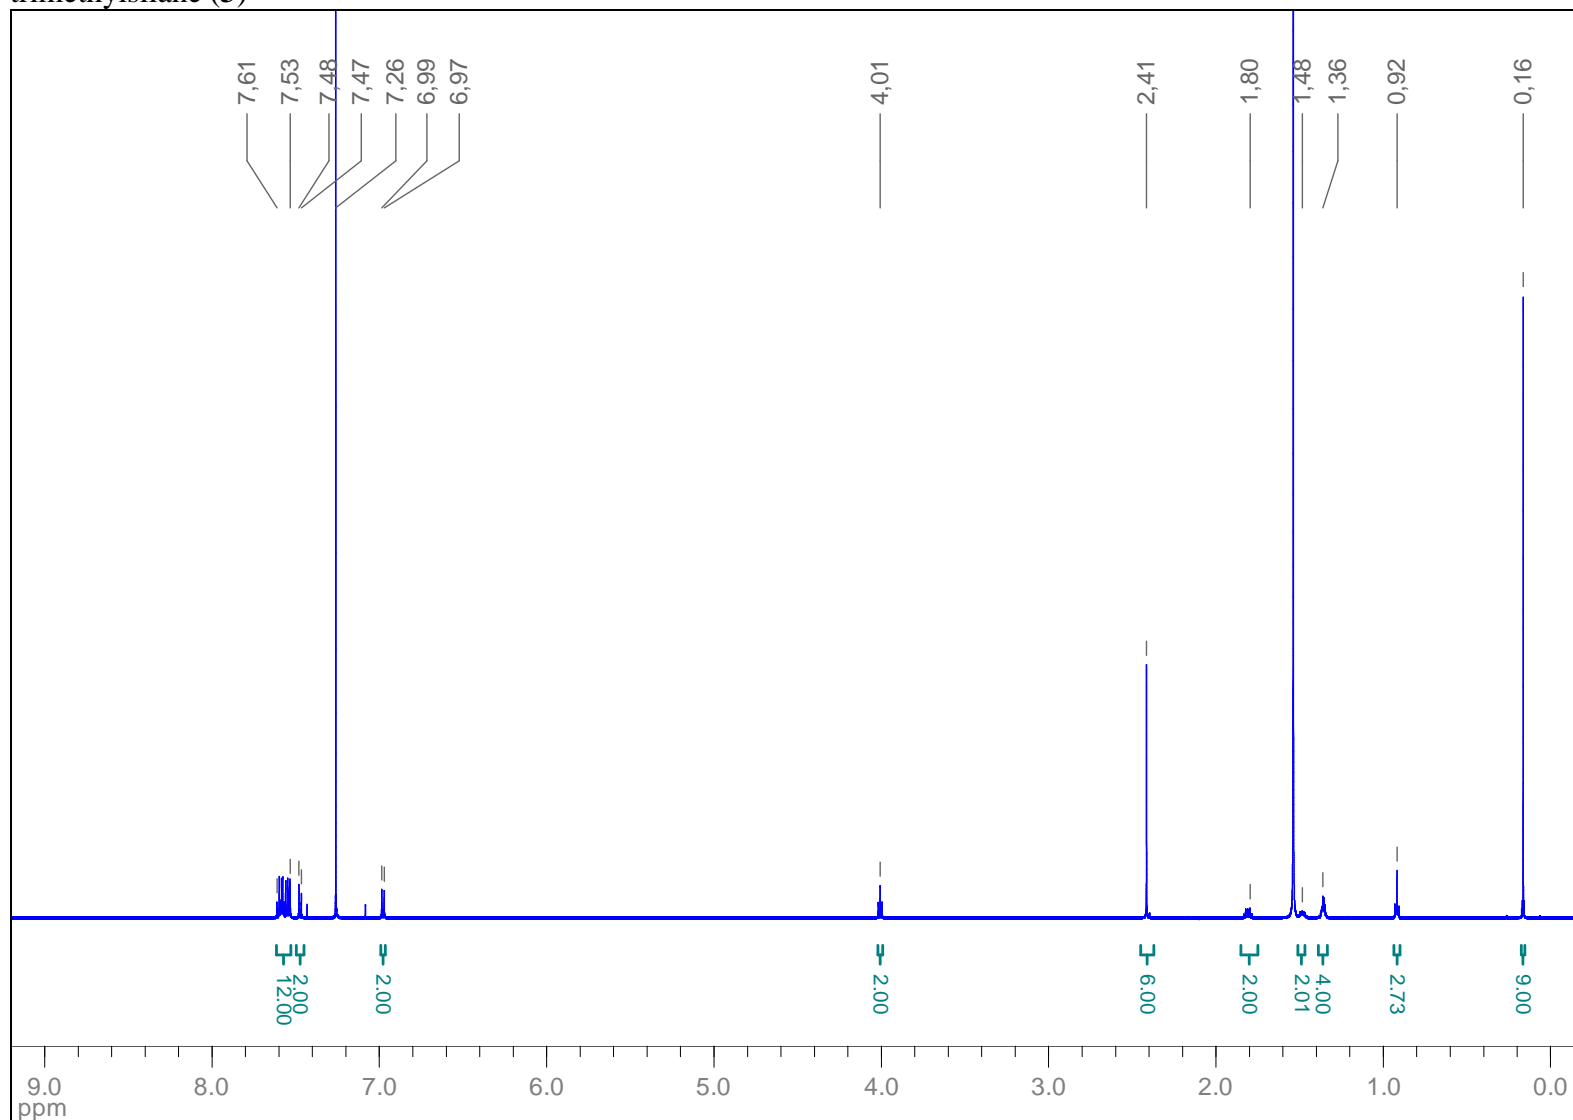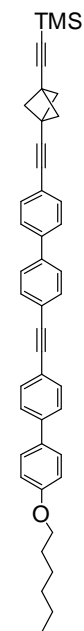

$^{13}\text{C}$  NMR (150 MHz,  $\text{CDCl}_3$ ): ((3-((4'-((4'-(Hexyloxy)biphenyl-4-yl)ethynyl)biphenyl-4-yl)ethynyl)bicyclo[1.1.1]pent-1-yl)ethynyl)-trimethylsilane (**3**)

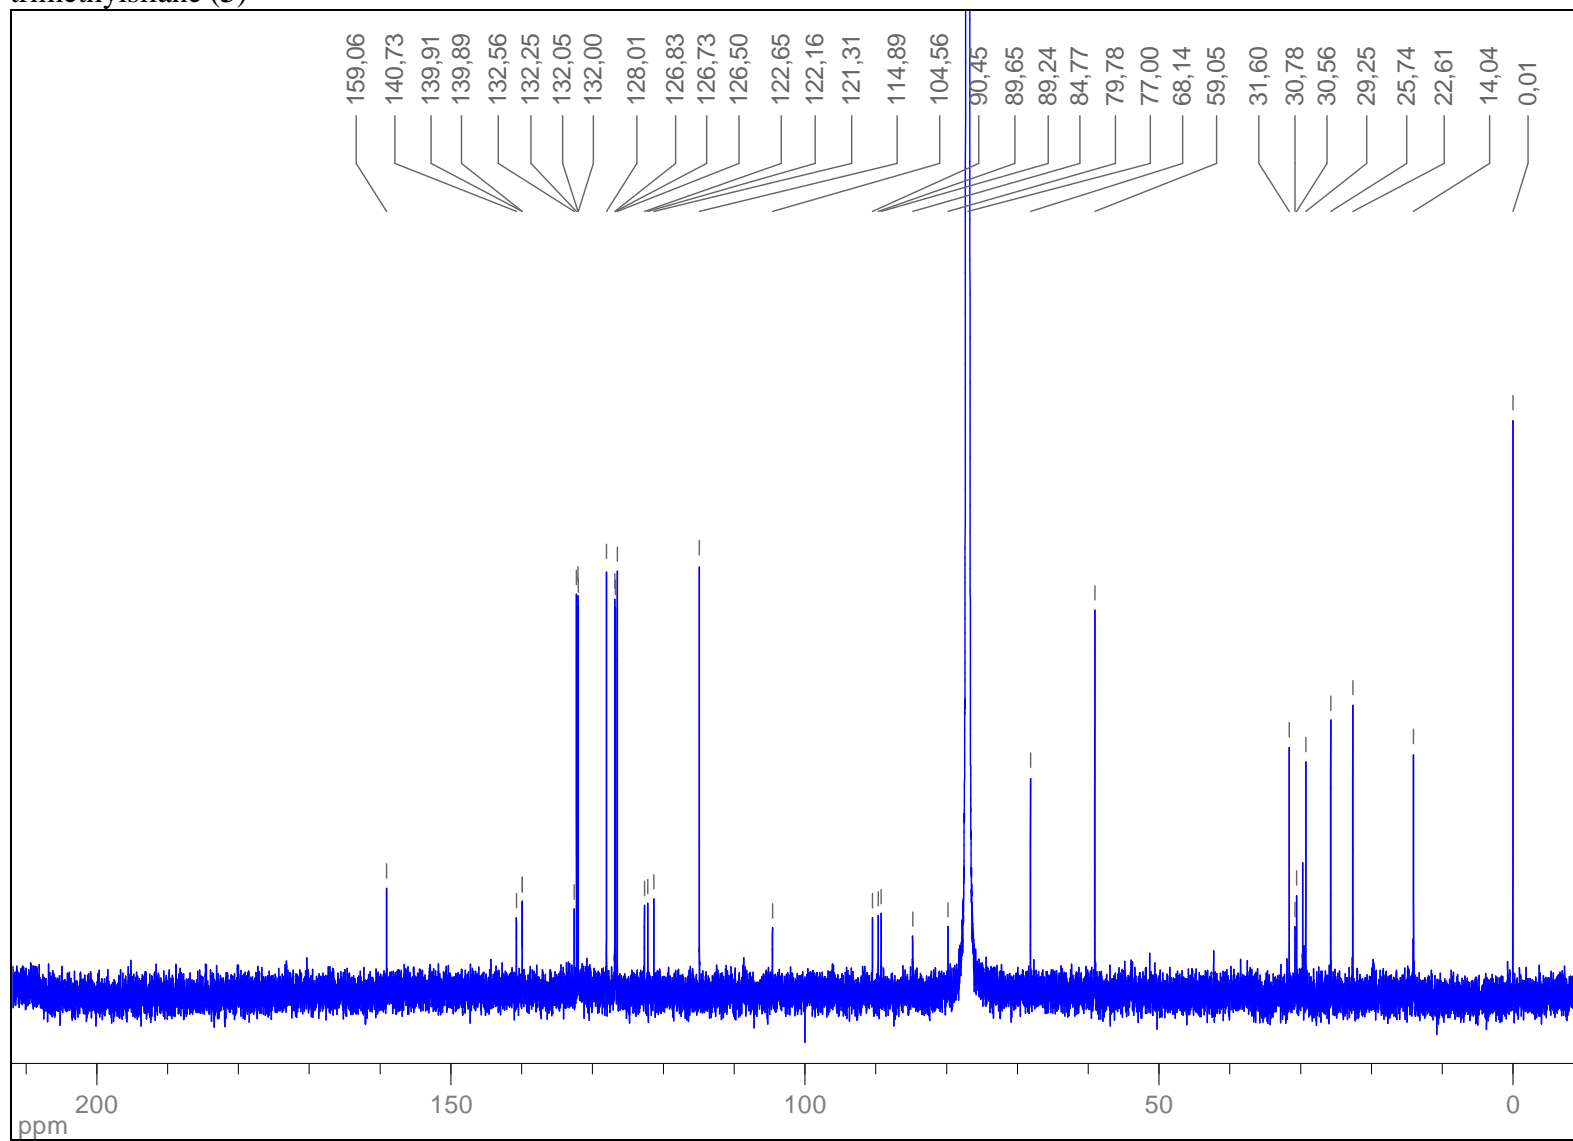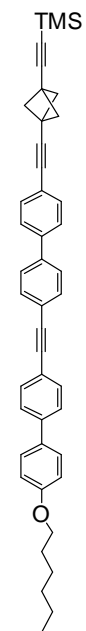

$^{13}\text{C}$  APT NMR (150 MHz,  $\text{CDCl}_3$ ): ((3-((4'-((4'-(Hexyloxy)biphenyl-4-yl)ethynyl)biphenyl-4-yl)ethynyl)bicyclo[1.1.1]pent-1-yl)ethynyl)-trimethylsilane (**3**)

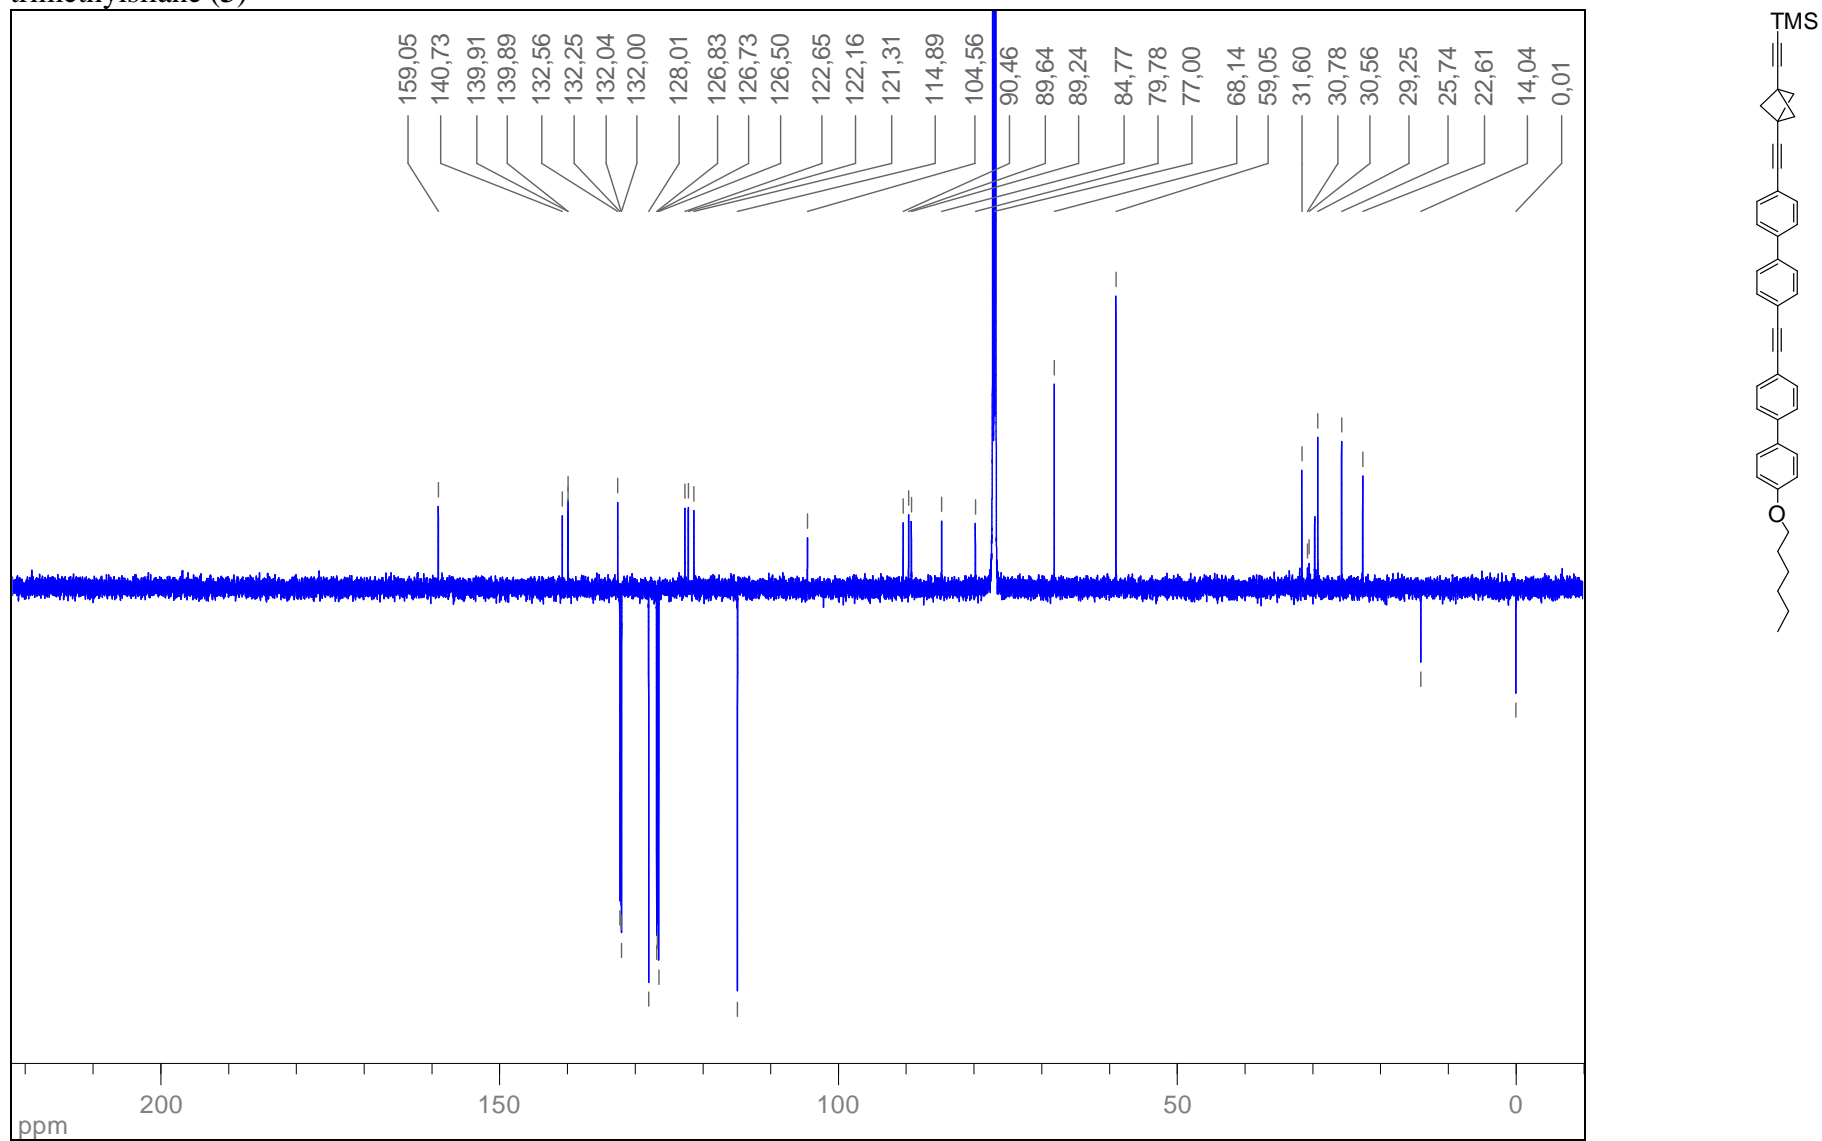

$^1\text{H}$  NMR (400 MHz,  $\text{CDCl}_3$ ): 1,4'''-Dihexyl-4,1':4',1'':4'',1''''-quaterphenyl (**4**)

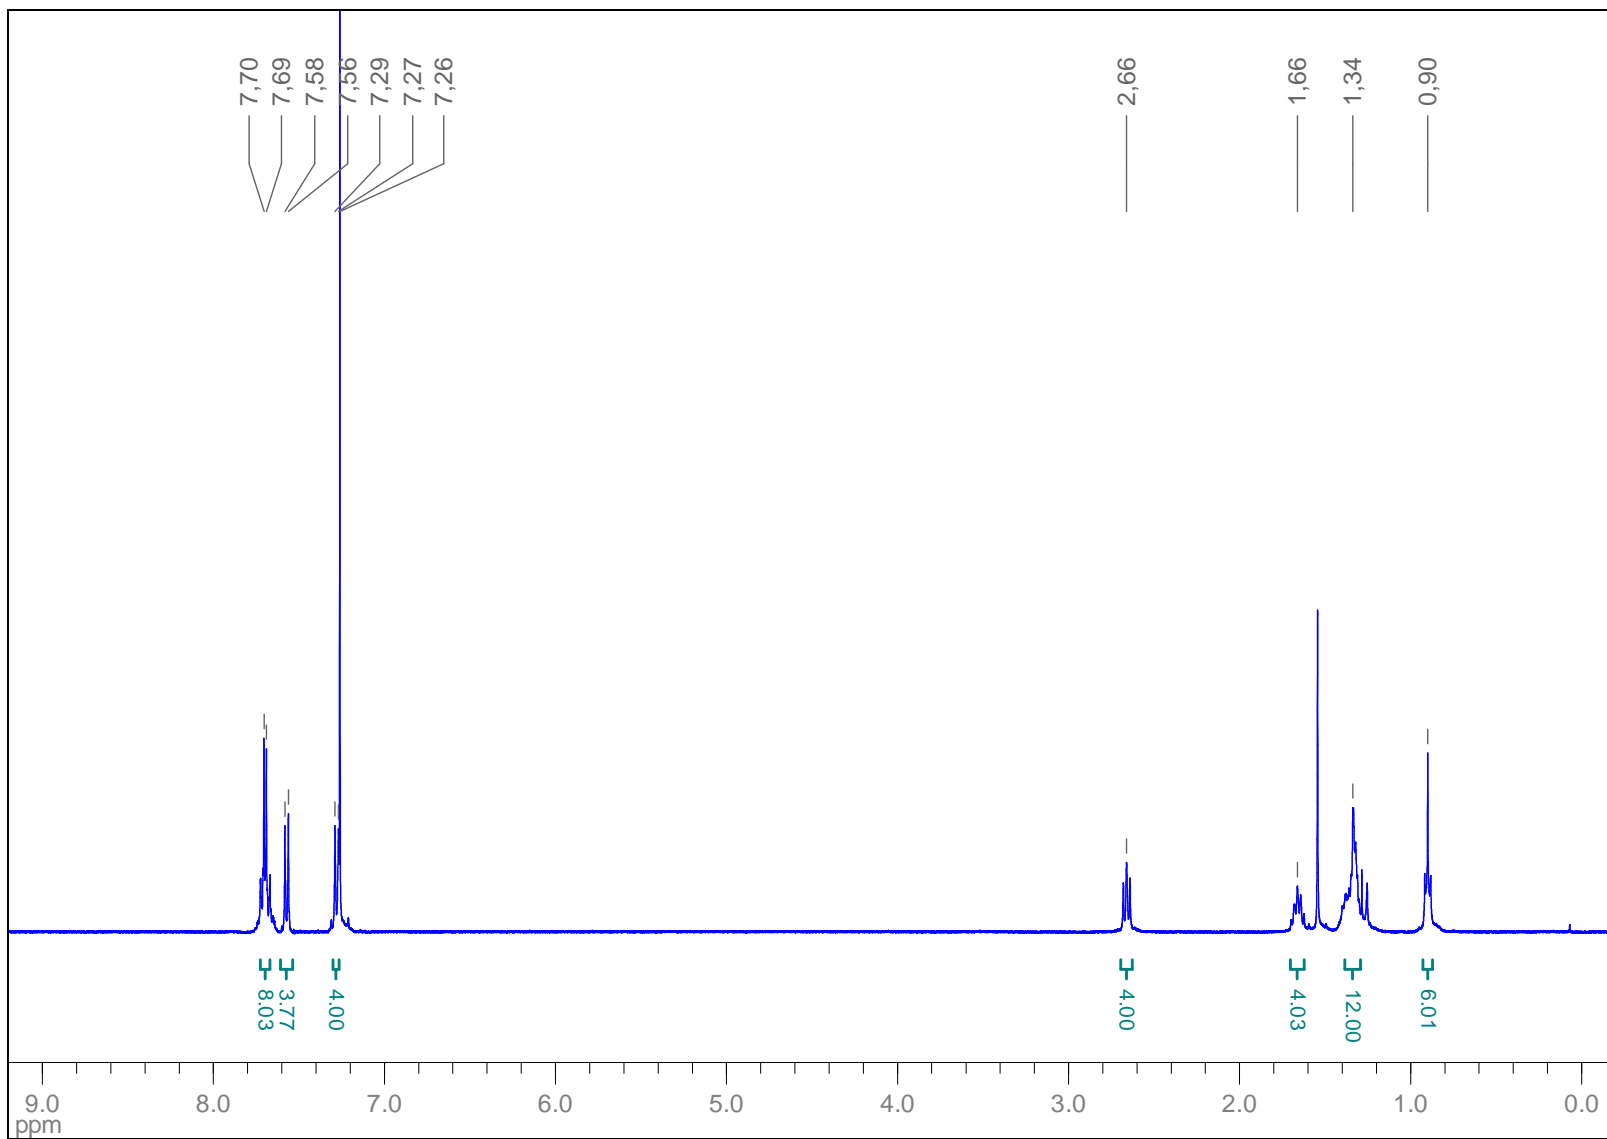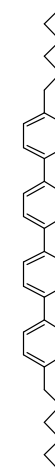

$^{13}\text{C}$  APT NMR (125 MHz,  $\text{CDCl}_3$ ): 1,4''''-Diethyl-4,1':4',1'':4'',1''''-quaterphenyl (4)

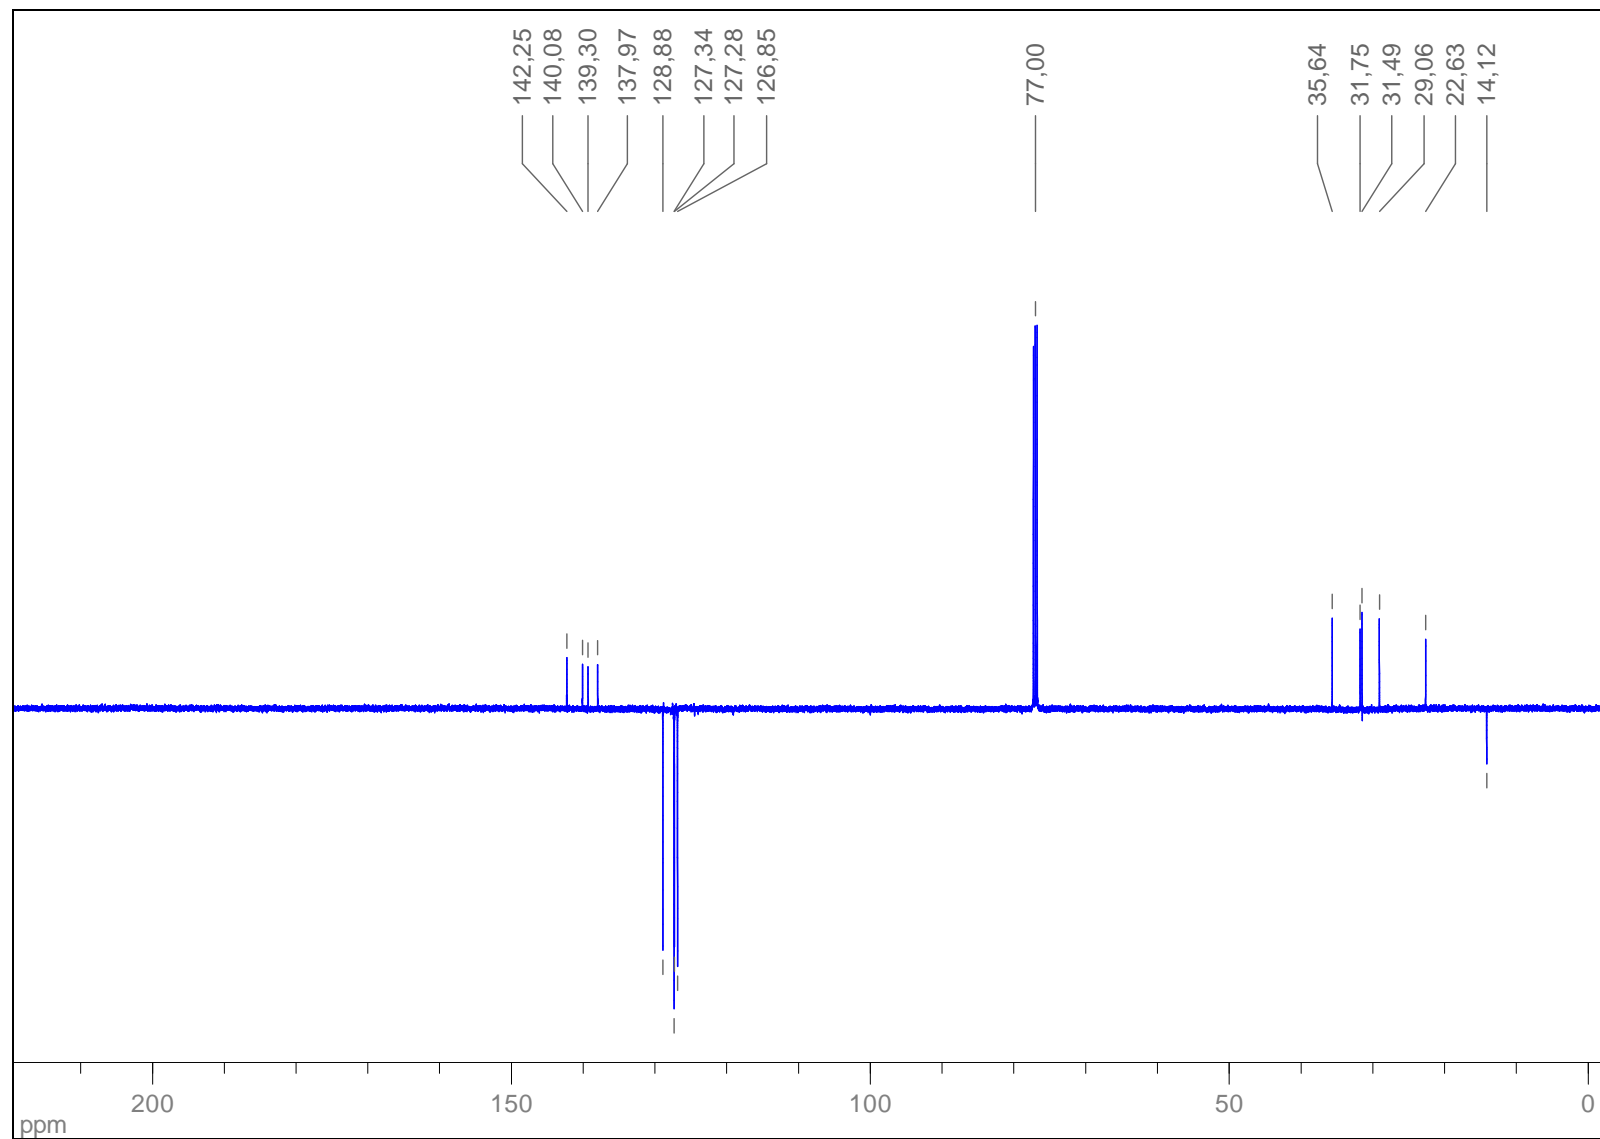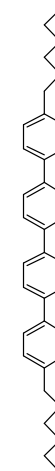

<sup>1</sup>H NMR (400 MHz, CDCl<sub>3</sub>): 4-*tert*-Butoxy-4'-ethynylbiphenyl (**8**)

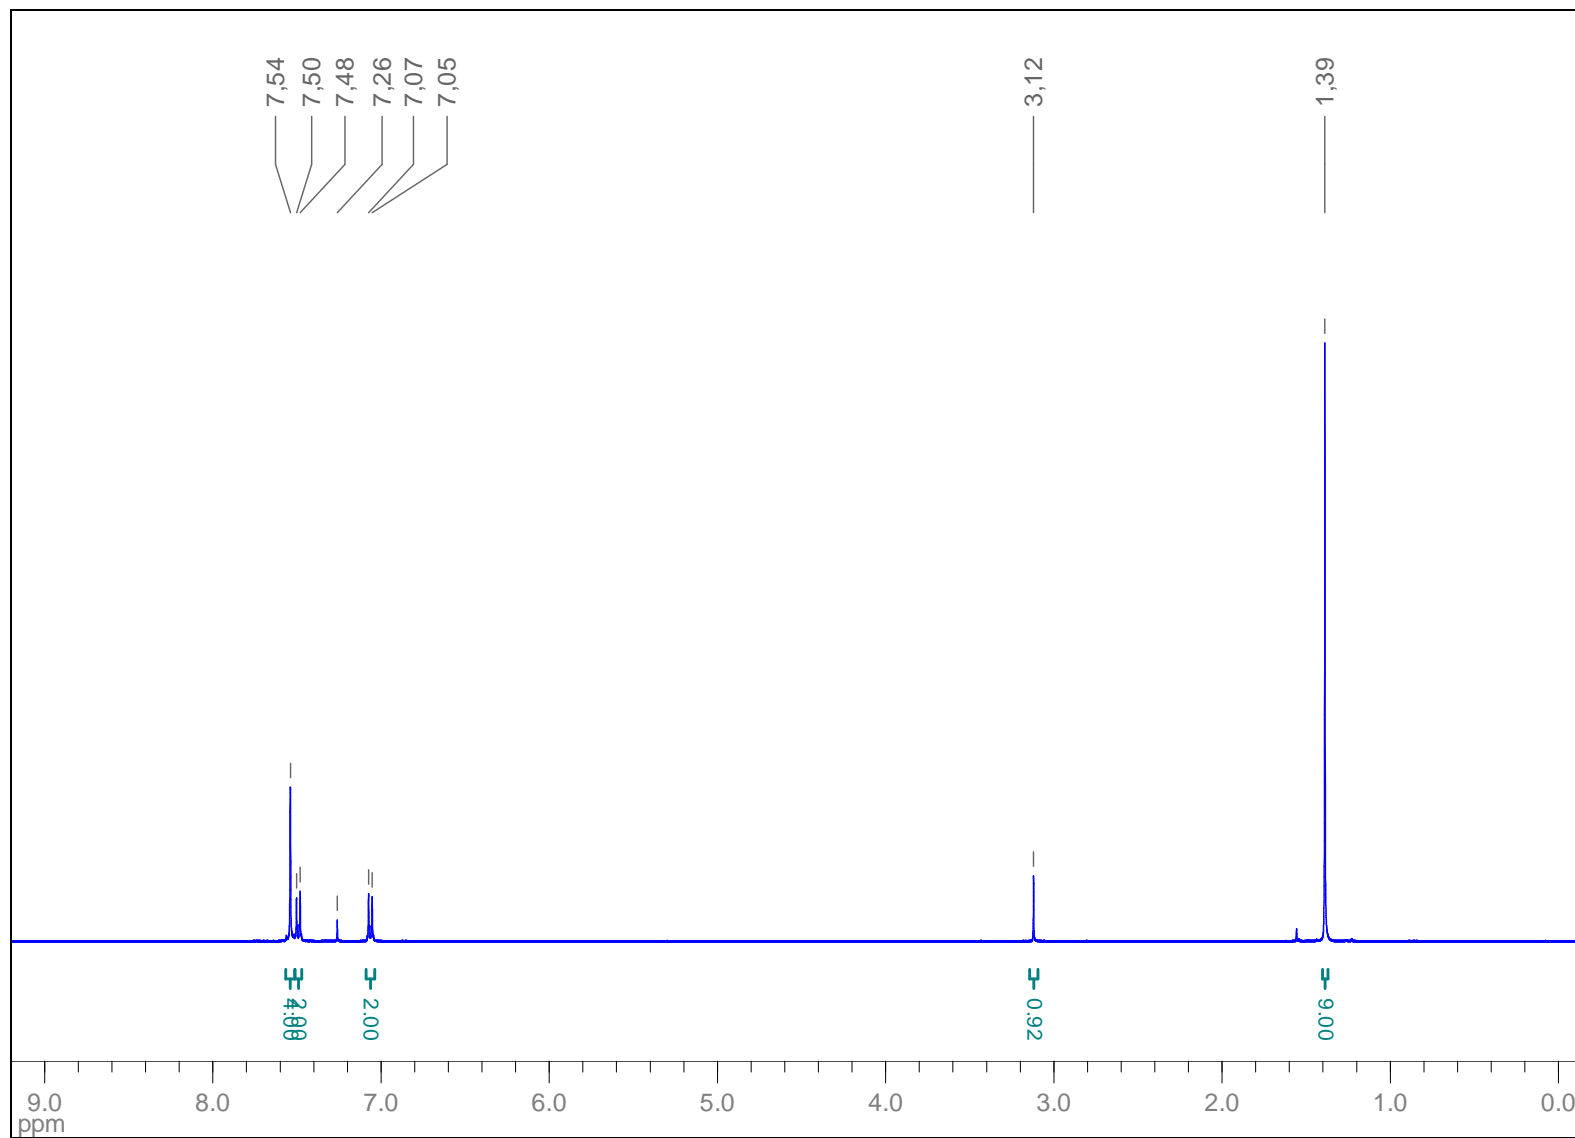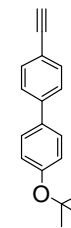

<sup>13</sup>C NMR (100 MHz, CDCl<sub>3</sub>): 4-*tert*-Butoxy-4'-ethynylbiphenyl (**8**)

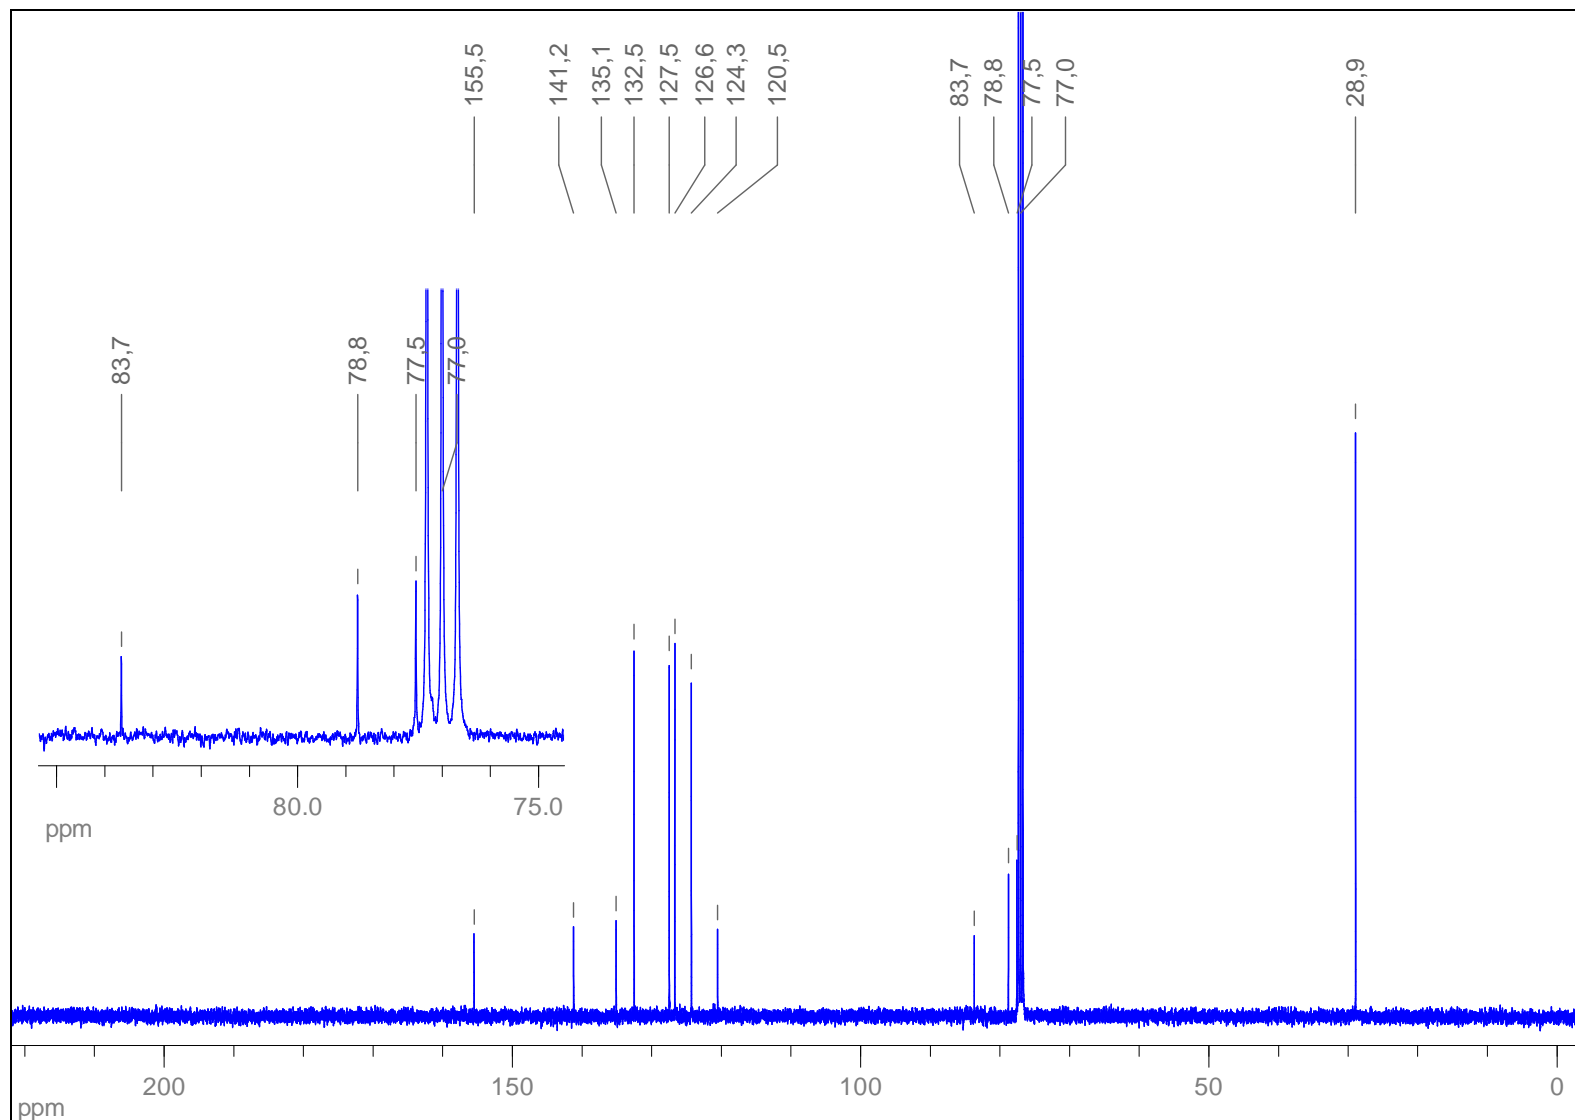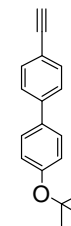



$^{13}\text{C}$  APT NMR (100 MHz,  $\text{CDCl}_3$ ): 4-*tert*-Butoxy-4'-ethynylbiphenyl (**8**)

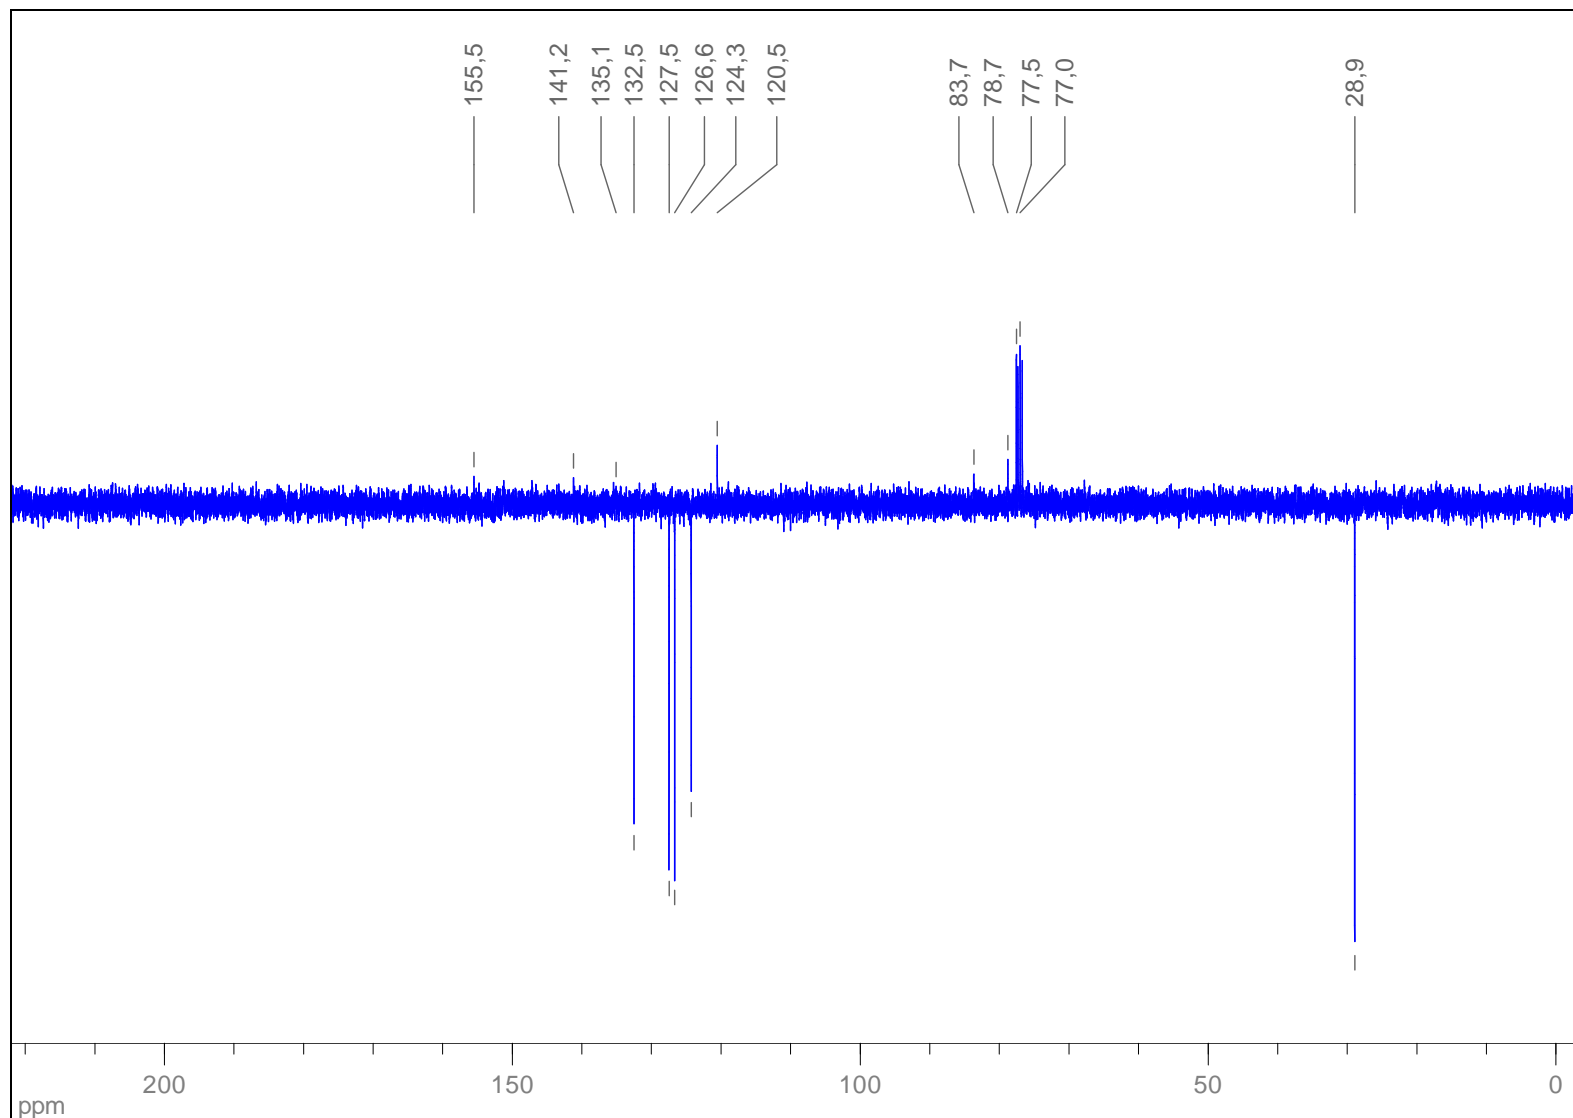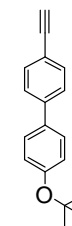

$^1\text{H}$  NMR (400 MHz,  $\text{CDCl}_3$ ): ((4'-*tert*-Butoxybiphenyl-4-yl)ethynyl)trimethylsilane (**13**)

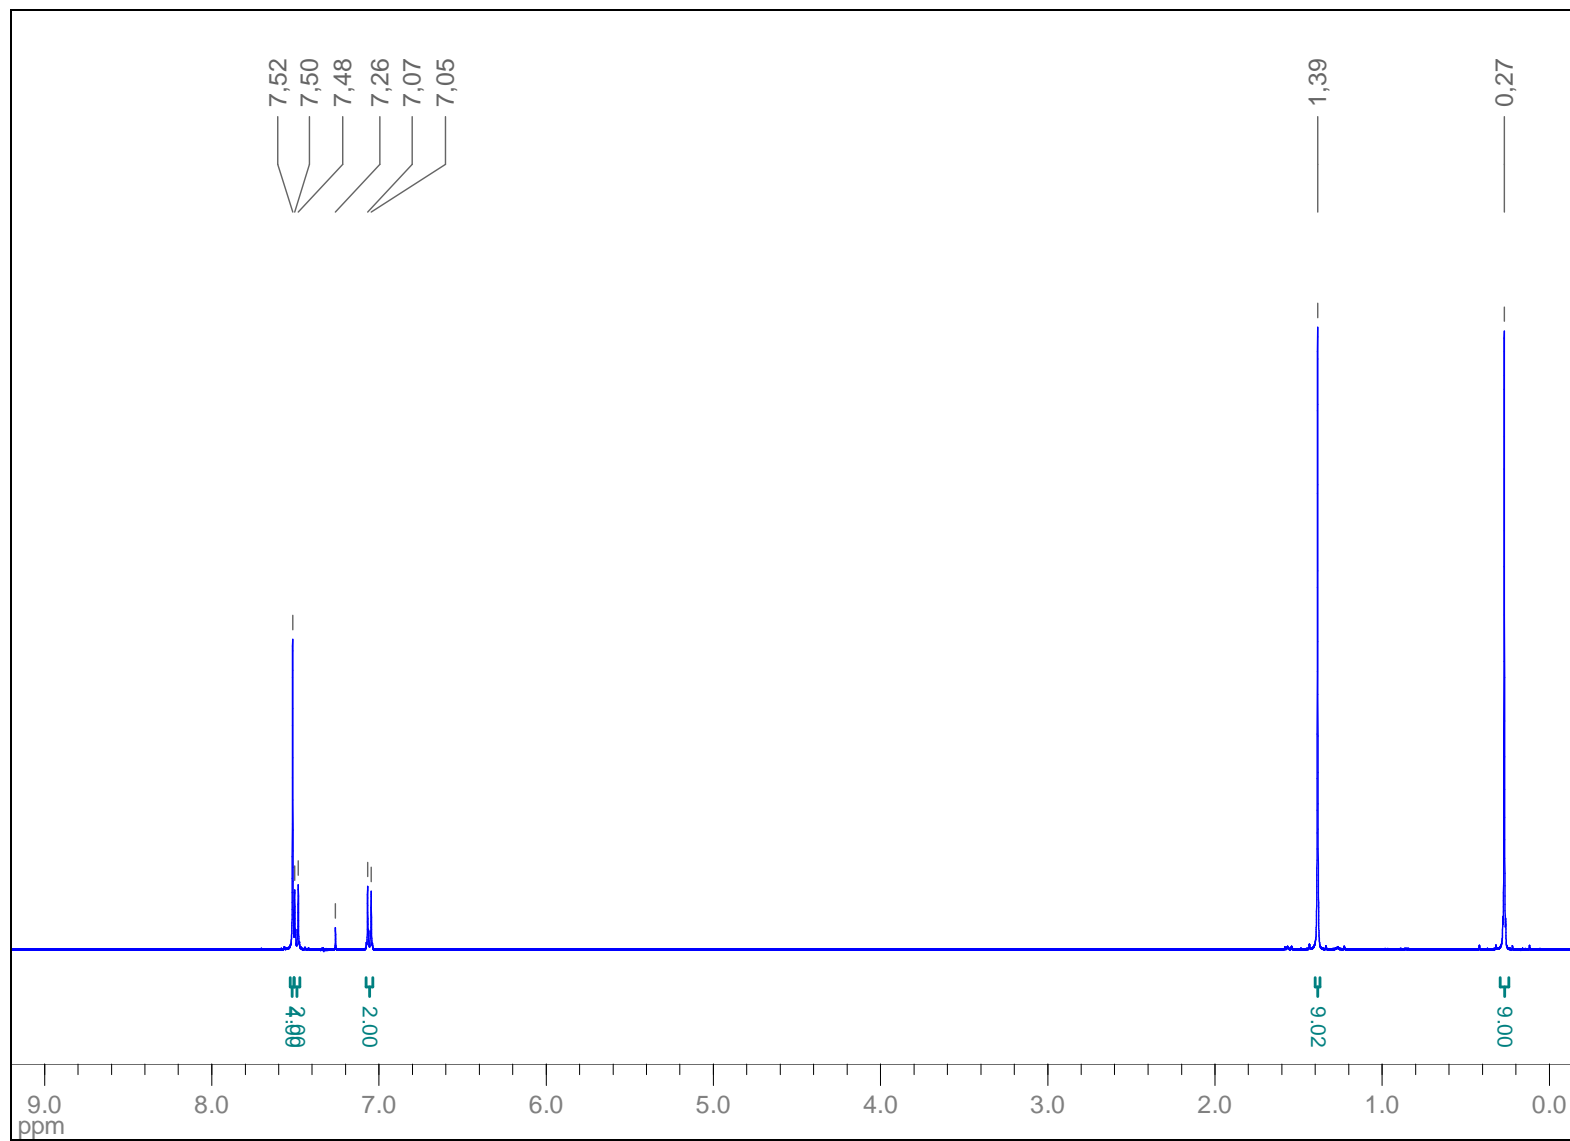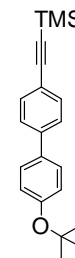

$^{13}\text{C}$  NMR (100 MHz,  $\text{CDCl}_3$ ): ((4'-*tert*-Butoxybiphenyl-4-yl)ethynyl)trimethylsilane (**13**)

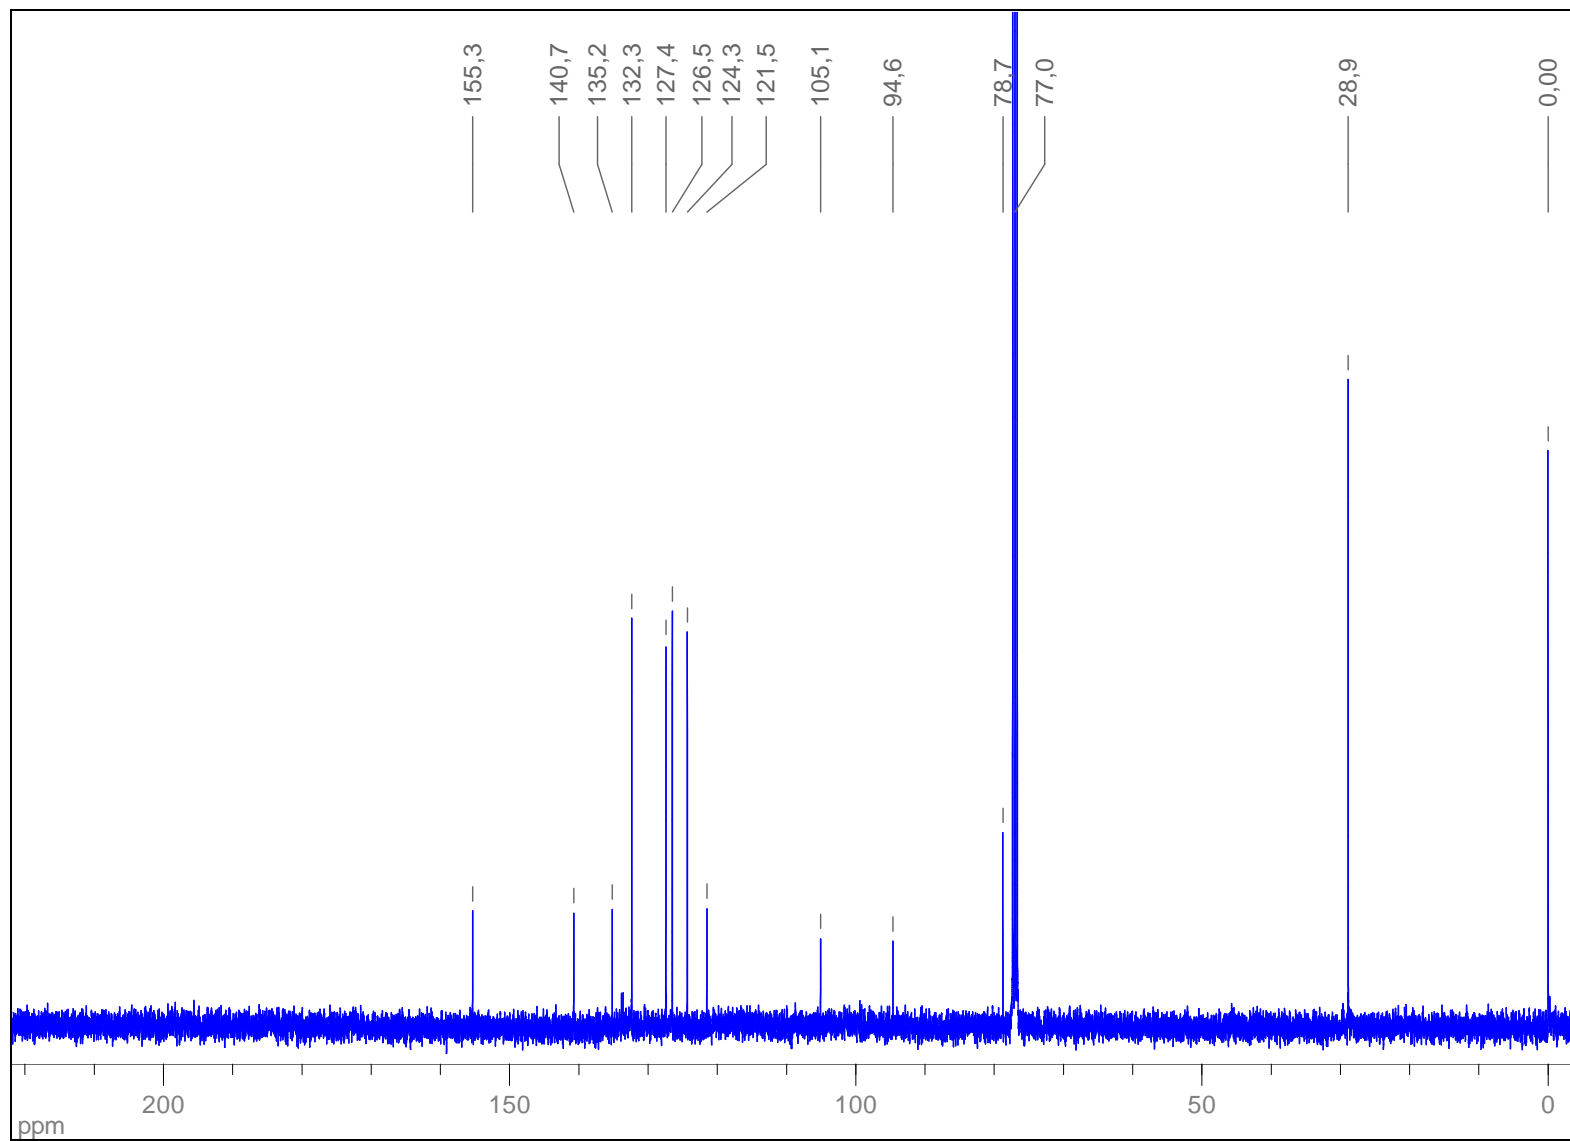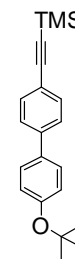

$^{13}\text{C}$  APT NMR (100 MHz,  $\text{CDCl}_3$ ): ((4'-*tert*-Butoxybiphenyl-4-yl)ethynyl)trimethylsilane (**13**)

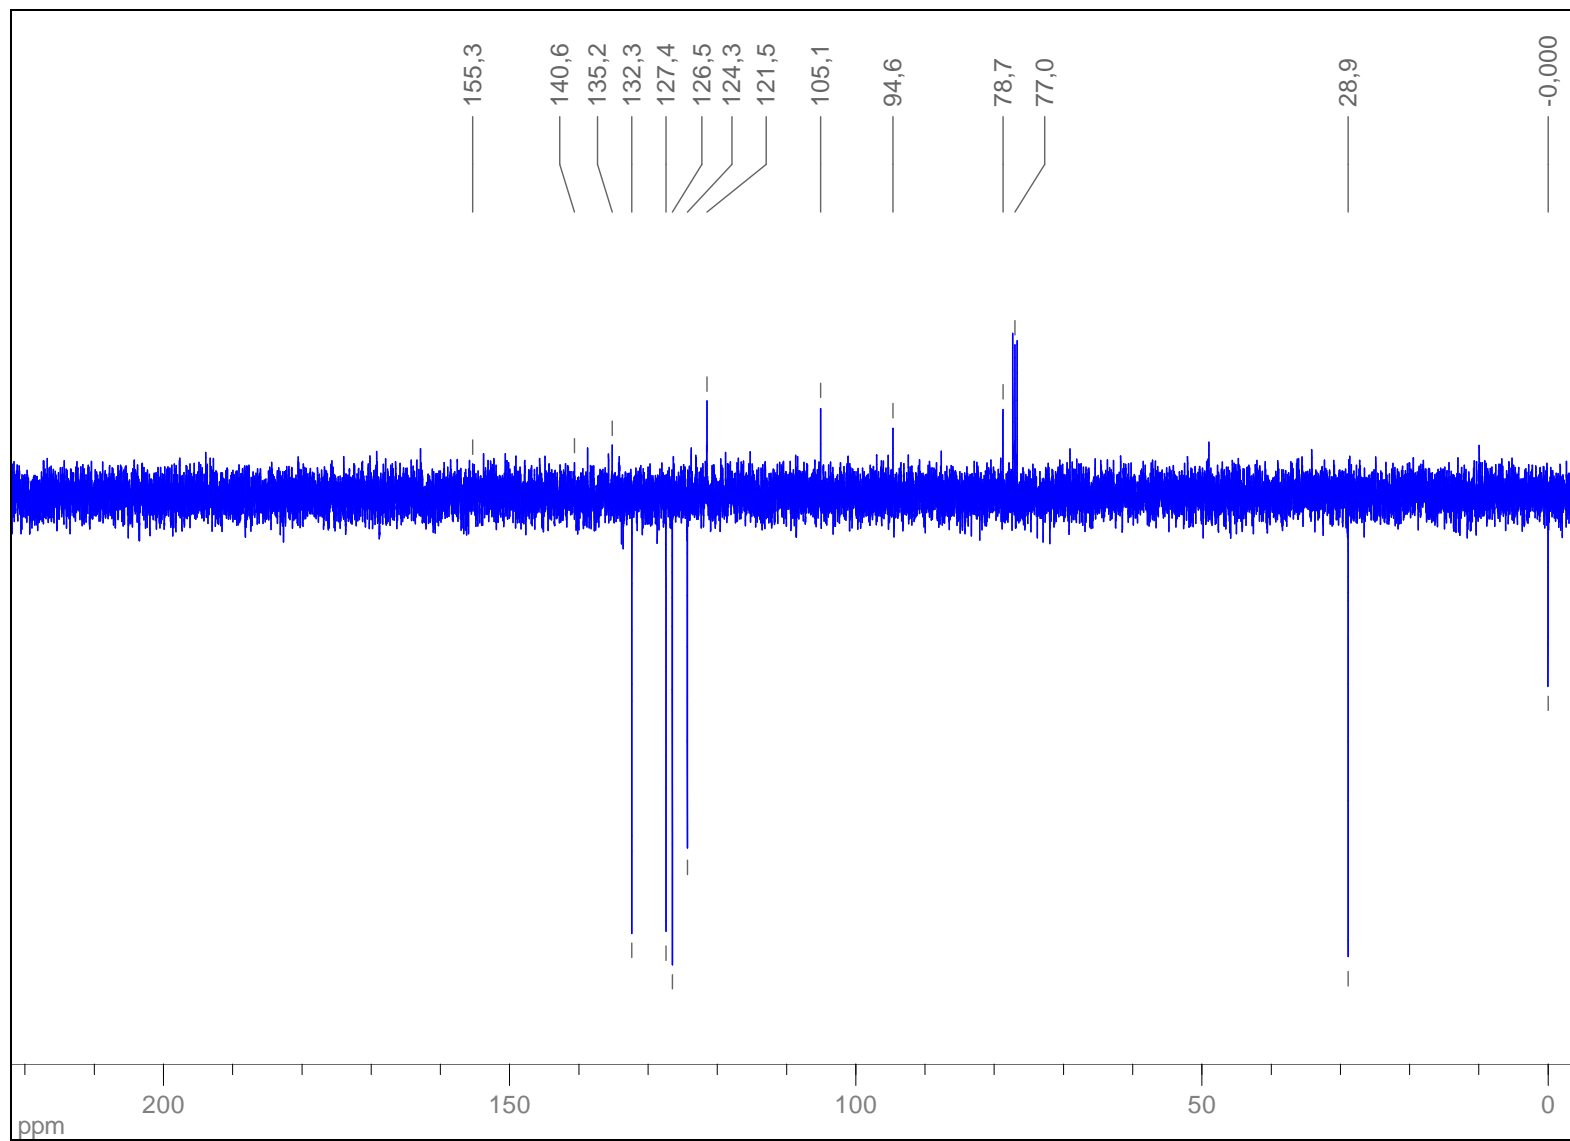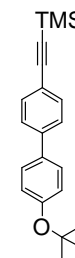

Supplement: jp5b01960_si_001.pdf [file jp5b01960_si_001.pdf]
